# Supplementary material for: Targeting Melanoma-Associated Fibroblasts (MAFs) with Activated γδ (Vδ2) T Cells: An In Vitro Cytotoxicity Model
Source: MDPI journal article supplement (doi:10.3390/ijms241612893), 2023-08-17
Supplement: s1 [file s1]

## Supplementary Methods

### *ZA Cell Counting Kit-8 (CCK-8) assay on MAFs*

MAFs from 3 donors were plated in triplicate in 96-well plates (25,000 cells/well) in DMEM supplemented with 20% FBS, P/S, and L-glutamine. On the next day, the medium was changed to mimic the co-culture environment (RPMI, 10% FBS, P/S, L-glutamine, and 100 IU/mL IL-2), and the cells were incubated with 0–5  $\mu$ Molar ZA for 5 days.

For the CCK-8 assay (Cell Counting Kit-8, Dojindo Laboratories, Kumamoto, Japan), the medium was changed to 100  $\mu$ L/well of serum-free RPMI, P/S, and L-glutamine, and 10  $\mu$ L of CCK-8 reagent was added. Cells were incubated in a cell culture incubator (37 °C, 5% CO<sub>2</sub>) for an hour, and the OD at 450–630 nm was measured in an ELISA plate reader. Empty wells (no cells, only medium) were used as blank controls.

### *Flow cytometry apoptosis assays in MAFs*

MAFs from 3 donors were plated in 12-well plates in RPMI medium supplemented with 10% FBS, P/S, and L-glutamine, as well as 0–5  $\mu$ M ZA. Cells were incubated for 5 days without a change of media. Apoptotic populations were analyzed by using flow cytometry, as described in the Methods section (4.4 *Apoptosis assays using  $\gamma\delta$  T cells and MAFs*).

### *Flow cytometry apoptosis assays in normal dermal fibroblasts (NDFs) and the SK-MEL-28 cell line*

NDFs from 3 donors and the SK-MEL-28 melanoma cell line were plated in 12-well plates in RPMI medium supplemented with 10% FBS, P/S, and L-glutamine, as well as 100 IU/mL IL-2 and 1–2.5  $\mu$ M ZA. Cells were incubated for 5 days without a change of media. Apoptotic populations were analyzed by using flow cytometry, as described in the Methods section (4.4 *Apoptosis assays using  $\gamma\delta$  T cells and MAFs*). SK-MEL-28 cells were gated as CD45- and CD73+ [55]. For the statistical analysis, two-way ANOVA was performed with a Bonferroni post-hoc test.

### *BTN3A1 surface expression on NDFs, MAFs, and the SK-MEL-28 cell line*

The surface expression of BTN3A1 was analyzed on NDFs, MAFs, and the SK-MEL-28 cell line by using flow cytometry with Cytoflex V5-B5-R3 (Beckman Coulter) and the FlowJo® (Becton Dickinson and Company) software. Briefly, cells were labeled with a PE-conjugated anti-BTN3A1 (CD277) antibody (Miltenyi Biotec). The gating strategy consisted of cell size differentiation, and BTN3A1-positive cells were determined by using unstained controls of each cell type.

### *Statistical analysis*

The datasets of the apoptosis assay with NDFs and the SK-MEL-28 cell line were analyzed by using two-way ANOVA and Bonferroni's post-hoc test with the Graphpad Prism 7.0 software. The BTN3A1 expression data were analyzed by using one-way ANOVA and Tukey's post-hoc test.  $p$ -values of  $<0.05$  were accepted as statistically significant.

a

### Zoledronic acid effect on MAFs viability

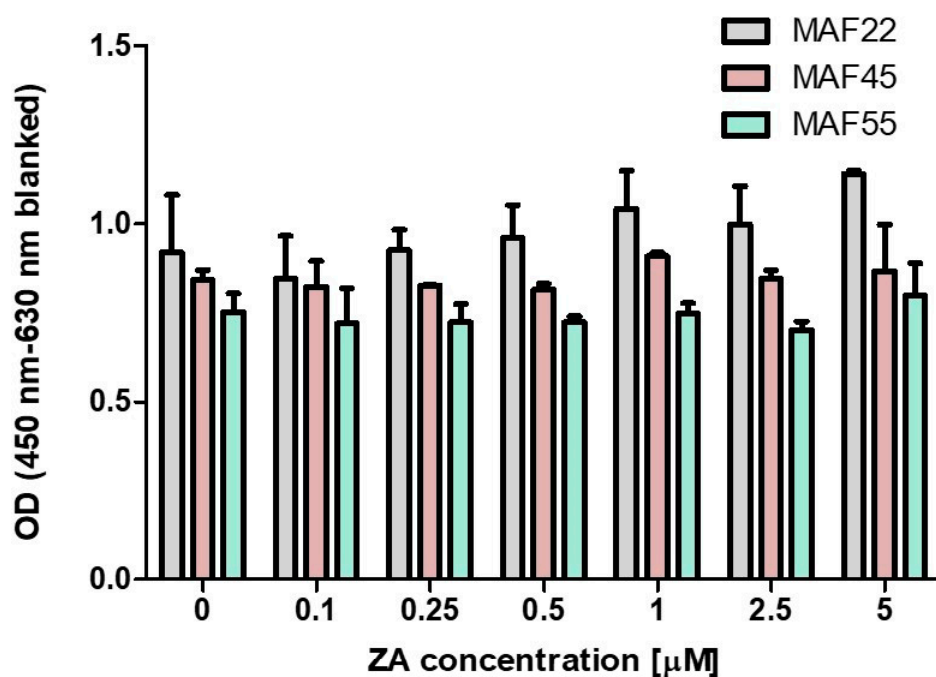

b

### Early apoptotic (Annexin V<sup>+</sup>; 7AAD<sup>-</sup>) MAFs

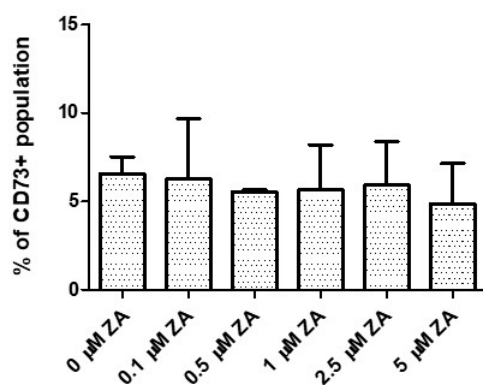

c

### Late apoptotic (Annexin V<sup>+</sup>; 7AAD<sup>+</sup>) MAFs

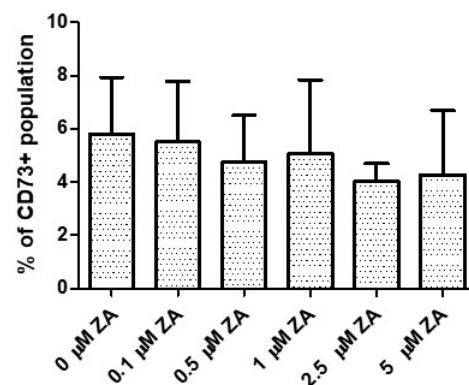

**Figure S1.** Effect of ZA on the viability of MAFs. (a) OD values measured in the CCK-8 assay for ZA (0–5  $\mu$ M)-treated MAFs (n=3). Non-treated MAFs were used as controls. (b) Percentages of early apoptotic (Annexin V<sup>+</sup>, 7AAD<sup>-</sup>) and (c) late apoptotic (Annexin V<sup>+</sup>, 7AAD<sup>+</sup>) populations of MAFs [CD73<sup>+</sup>; CD45<sup>-</sup>] (n=3). Control: MAFs without ZA treatment. Error bars represent means  $\pm$  SD.

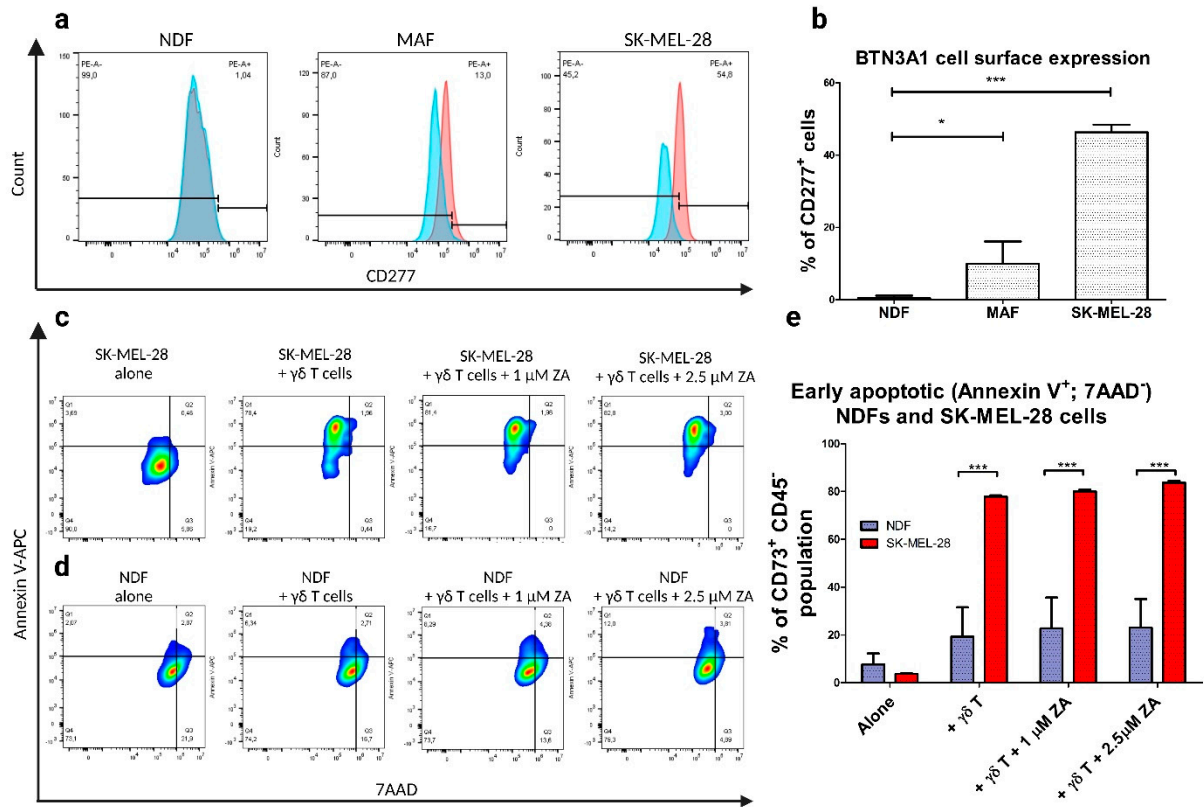

**Figure S2.** The surface expression of BTN3A1 and  $\gamma\delta$ -T-cell-induced apoptosis in fibroblasts and SK-MEL-28 cells. (a) Representative histograms of BTN3A1 expression in NDFs, MAFs, and SK-MEL-28 cells. (b) BTN3A1 expression on fibroblasts and the SK-MEL-28 cell line. (c) Representative density plots of early apoptotic (Annexin V<sup>+</sup>; 7AAD<sup>-</sup>) populations in the SK-MEL-28 cell line. (d) Representative density plots of early apoptotic (Annexin V<sup>+</sup>; 7AAD<sup>-</sup>) populations in NDFs. (e) Percentage of early apoptotic populations of NDFs and the SK-MEL-28 cell line [CD73<sup>+</sup> CD45<sup>-</sup>] after 5 days of co-culture with  $\gamma\delta$  T cells. Control: co-culture with unstimulated  $\gamma\delta$  T cells. (d) Representative histograms of BTN3A1 expression in NDFs (n=3), MAFs (n=3), and the SK-MEL-28 cell line. Error bars represent means  $\pm$  SD. \*p < 0.05 \*\*p < 0.01 and \*\*\*p < 0.001.
